# Supplementary material for: Chromosomal Evolution of the Talpinae
Source: MDPI journal article supplement (doi:10.3390/genes14071472), 2023-07-19
Supplement: s1 [file s1]

**Supplement. Table S2.** The chromosomes of the Talpinae species arranged according to the *Talpa altaica* chromosomes analyzed by chromosome painting

| <i>Talpa altaica</i> | <i>Euroscaptor parvidens</i> | <i>Mogera imaizumii</i> | <i>Urotrichus talpoides</i> |
|----------------------|------------------------------|-------------------------|-----------------------------|
| 1                    | 9                            | 14                      | 1q                          |
| 2                    | 1p+15                        | 15+17                   | 1p+8p                       |
| 3                    | 6                            | 1                       | 2                           |
| 4                    | 3                            | 11                      | 3                           |
| 5                    | 5                            | 5                       | 5                           |
| 6                    | 2                            | 8                       | 14                          |
| 7                    | 14                           | 10                      | 4                           |
| 8                    | 7                            | 13                      | 7                           |
| 9                    | 4                            | 12                      | 6                           |
| 10                   | 8                            | 2                       | 8q+15                       |
| 11                   | 16+17                        | 3                       | 9                           |
| 12                   | 10                           | 5                       | 10                          |
| 13                   | 1q                           | 16                      | 13                          |
| 14                   | 12                           | 9                       | 11                          |
| 15                   | 11                           | 4                       | 12                          |
| 16                   | 13                           | 7                       | 16                          |
