# Supplementary material for: Chromosomal Evolution of the Talpinae
Source: MDPI journal article supplement (doi:10.3390/genes14071472), 2023-07-19
Supplement: s1 [file s1]

**Supplement. Table S3.** Corresponding between sorting samples and chromosomes of the *Talpa altaica*

| <i>N</i> | <i>Peak</i> | <i>Probe</i> | <i>Chromosome</i> |
|----------|-------------|--------------|-------------------|
| 1        | A           | 1, 2, 3      | 1                 |
| 2        | I           | 15, 22       | 2                 |
| 3        | C           | 3            | 3                 |
| 4        | K           | 9, 18        | 4+7               |
| 5        | D           | 4            | 5                 |
| 6        | J           | 8, 13        | 6+9               |
| 7        | L           | 10           | 8                 |
| 8        | E           | 5            | 10                |
| 9        | F           | 6            | 11                |
| 10       | G           | 21           | 12                |
| 11       | H           | 7            | 13+X              |
| 12       | N           | 12, 20       | 14                |
| 13       | M           | 11, 19       | 15                |
| 14       | B           | 2            | 16                |
